# Supplementary material for: Positive Relationship between Total Antioxidant Status and Chemokines Observed in Adults
Source: Oxid Med Cell Longev. 2014 Aug 28;2014:693680. doi: 10.1155/2014/693680 (PMC4164799; doi:10.1155/2014/693680)
Supplement: Supplementary file 1 — Supplementary Table 1 provides Intra-assay CVs using triplicate study samples as well as the intra- and inter-assay CVs using external quality control samples from healthy volunteers in the US. Supplementary Table 2 presents the concentrations of chemokines in the current study sample versus the external quality control samples collected from healthy volunteers in the US. Supplementary Table 3 shows correlation between chemokines and oxidative stress biomarkers among nonsmokers. [file 693680.f1.zip]

Archive with 2 entries (2 files):
- table1,2.docx
- table3.docx
